# Supplementary material
Source: PubMed Central journal article supplement (PMC4859607)
Supplement: JB.00023-16_zjb999094035so1.pdf [file JB.00023-16_zjb999094035so1.pdf]

**Table S1:** analysis of *cotH* locus in *Bacillus* species with completely sequenced genomes

| Species <sup>a</sup>             | CotH orthologue <sup>b</sup> | CotG orthologue <sup>b</sup> | Divergent gene <sup>c</sup> | Tax ID <sup>d</sup> | Accession number <sup>e</sup> |
|----------------------------------|------------------------------|------------------------------|-----------------------------|---------------------|-------------------------------|
| 1. <i>B. subtilis spizizenii</i> | +                            | +                            | +                           | 655816              | NC_014479.1                   |
| 2. <i>B. amyloliquefaciens</i>   | +                            | +                            | +                           | 326423              | NC_014551.1                   |
| 3. <i>B. atrophaeus</i>          | +                            | +                            | +                           | 720555              | NC_014639.1                   |
| 4. <i>B. methylotrophicus</i>    | +                            | +                            | +                           | 326423              | NC_009725.1                   |
| 5. <i>B. sp. Pc3</i>             | +                            | +                            | +                           | 1446792             | CP010406.1                    |
| 6. <i>B. sp. BH072</i>           | +                            | +                            | +                           | 1570330             | CP009938.1                    |
| 7. <i>B. sp. BS34A</i>           | +                            | +                            | +                           | 1639654             | LN680001.1                    |
| 8. <i>B. licheniformis</i>       | +                            | -                            | +                           | 279010              | NC_006270.3                   |
| 9. <i>B. anthracis</i>           | +                            | -                            | +                           | 1392                | NC_005945.1                   |
| 10. <i>B. cereus</i>             | +                            | -                            | +                           | 396343              | NC_003909.8                   |
| 11. <i>B. thuringiensis</i>      | +                            | -                            | +                           | 714359              | NC_014171.1                   |
| 12. <i>B. cytotoxicus</i>        | +                            | -                            | +                           | 315749              | NC_009674.1                   |
| 13. <i>B. weihenstephanensis</i> | +                            | -                            | +                           | 315730              | NC_010184.1                   |
| 14. <i>B. toyonensis</i>         | +                            | -                            | +                           | 155322              | NC_022781.1                   |
| 15. <i>B. mycoides</i>           | +                            | -                            | +                           | 1405                | CP007626.1                    |
| 16. <i>B. pumilus</i>            | +                            | -                            | +                           | 536229              | NC_009848.1                   |
| 17. <i>B. megaterium</i>         | +                            | -                            | +                           | 545693              | NC_014019.1                   |
| 18. <i>B. smithii</i>            | +                            | -                            | +                           | 1479                | CP012024.1                    |
| 19. <i>B. bombysepticus</i>      | +                            | -                            | +                           | 658666              | CP007512.1                    |
| 20. <i>B. sp. JS</i>             | +                            | -                            | +                           | 1127744             | NC_017743.1                   |
| 21. <i>B. sp. 1NLA3E</i>         | +                            | -                            | +                           | 666686              | NC_021171.1                   |
| 22. <i>B. sp. YP1</i>            | +                            | -                            | +                           | 1574141             | CP010014.1                    |
| 23. <i>B. sp. WP8</i>            | +                            | -                            | -                           | 756828              | CP010075.1                    |
| 24. <i>B. sp. LM 4-2</i>         | +                            | -                            | -                           | 1628753             | CP011101.1                    |
| 25. <i>B. sp. X1</i>             | -                            | ND                           | ND                          | 498382              | CP008855.1                    |
| 26. <i>B. sp. OxB-1</i>          | -                            | ND                           | ND                          | 98228               | AP013294.1                    |
| 27. <i>B. halodurans</i>         | -                            | ND                           | ND                          | 86665               | NC_002570.2                   |
| 28. <i>B. clausii</i>            | -                            | ND                           | ND                          | 79880               | NC_006582                     |
| 29. <i>B. pseudofirmus</i>       | -                            | ND                           | ND                          | 79885               | NC_013791.2                   |
| 30. <i>B. cellulolyticus</i>     | -                            | ND                           | ND                          | 1413                | CP002394.1                    |
| 31. <i>B. coagulans</i>          | -                            | ND                           | ND                          | 1121088             | CP009709.1                    |
| 32. <i>B. infantis</i>           | -                            | ND                           | ND                          | 324767              | NC_022524.1                   |
| 33. <i>B. iehensis</i>           | -                            | ND                           | ND                          | 300825              | CP003923.1                    |
| 34. <i>B. methanolicus</i>       | -                            | ND                           | ND                          | 1471                | CP007739.1                    |
| 35. <i>B. endophyticus</i>       | -                            | ND                           | ND                          | 135735              | CP011974.1                    |

<sup>a</sup> List of *Bacillus* species whose genomes have been completely sequenced (source KEGG, Kyoto Encyclopedia of Genes and Genomes database [http://www.genome.jp/kegg/catalog/org\\_list.html](http://www.genome.jp/kegg/catalog/org_list.html));

<sup>b</sup> presence (+) or absence (-) of a protein sharing a minimum of 40% sequence identity respect to CotH and CotG of *B. subtilis* 168

<sup>c</sup> presence (+) or absence (-) of an adjacent and divergent *orf* respect to *cotH*;

<sup>d</sup> Taxonomy ID from NCBI (<http://www.ncbi.nlm.nih.gov/taxonomy>)

<sup>e</sup> accession numbers of the respective genomic sequences

ND, not determined
