# Supplementary material
Source: PubMed Central journal article supplement (PMC4859607)
Supplement: JB.00023-16_zjb999094035so3.pdf [file JB.00023-16_zjb999094035so3.pdf]

**Table S3. *Bacillus subtilis* strains used in this study**

| <b>Strain</b> | <b>Relevant genotype</b>                                             | <b>Reference</b>       |
|---------------|----------------------------------------------------------------------|------------------------|
| <b>PY79</b>   | Wild type                                                            | [Youngman et al, 1984] |
| <b>AZ603</b>  | $\Delta cotG \Delta cotH::neo$                                       | [Saggese et al., 2014] |
| <b>AZ604</b>  | $\Delta cotG \Delta cotH::neo amyE::cotGstop, cotH$                  | [Saggese et al., 2014] |
| <b>AZ607</b>  | $\Delta cotG \Delta cotH::neo amyE::cotG$                            | [Saggese et al., 2014] |
| <b>AZ612</b>  | $\Delta cotG \Delta cotH::neo thrC::cotG\Delta$                      | This work              |
| <b>AZ613</b>  | $\Delta cotG \Delta cotH::neo amyE::cotGstop, cotH thrC::cotG\Delta$ | This work              |
| <b>AZ614</b>  | $\Delta cotG \Delta cotH::neo thrC::cotG-Cterm$                      | This work              |
| <b>AZ615</b>  | $\Delta cotG \Delta cotH::neo amyE::cotGstop, cotH thrC::cotG-Cterm$ | This work              |
| <b>AZ616</b>  | $\Delta cotG \Delta cotH::neo thrC::cotG-Nterm$                      | This work              |
| <b>AZ617</b>  | $\Delta cotG \Delta cotH::neo amyE::cotGstop, cotH thrC::cotG-Nterm$ | This work              |
| <b>AZ644</b>  | $cotS::gfp$                                                          | This work              |
| <b>AZ647</b>  | $\Delta cotG \Delta cotH::neo amyE::cotG cotS::gfp$                  | This work              |
| <b>AZ649</b>  | $\Delta cotG \Delta cotH::neo thrC::cotG\Delta cotS::gfp$            | This work              |
| <b>AZ660</b>  | $\Delta cotG \Delta cotH::neo thrC::cotG-Cterm cotS::gfp$            | This work              |
| <b>AZ661</b>  | $\Delta cotG \Delta cotH::neo thrC::cotG-Nterm cotS::gfp$            | This work              |
